1 Article

## 2 An Ecological Study to Investigate Links Between Atmospheric 3 Pollutants From Farming and SARS-CoV-2 Mortality

4 Paolo Contiero<sup>1</sup>, Alessandro Borgini<sup>1,12\*</sup>, Martina Bertoldi<sup>1</sup>, Anna Abita<sup>2</sup>, Giuseppe Cuffari<sup>3</sup>, Paola Tomao<sup>4</sup>, Maria  
5 Concetta D'Ovidio<sup>4</sup>, Stefano Reale<sup>5</sup>, Silvia Scibetta<sup>5</sup>, Giovanna Tagliabue<sup>6</sup>, Roberto Boffi<sup>7</sup>, Vittorio Krogh<sup>8</sup>, Fabio  
6 Tramuto<sup>9,10</sup>, Carmelo Massimo Maida<sup>9,10</sup>, Walter Mazzucco<sup>9,10,11</sup> and the "SARS-CoV-2 and Environment Working  
7 Group"<sup>\*\*</sup>

8 <sup>1</sup> Environmental Epidemiology Unit, Fondazione IRCCS Istituto Nazionale dei Tumori, 20133 Milan, Italy;  
9 alessandro.borgini@istitutotumori.mi.it

10 <sup>2</sup> UOC Qualità dell'Aria, ARPA Sicilia, 90146 Palermo, Italy; abita@arpa.sicilia.it

11 <sup>3</sup> Reporting Ambientale, Salute e Ambiente, ARPA Sicilia; 90146 Palermo, Italy; gcuffari@arpa.sicilia.it

12 <sup>4</sup> Inail-Dipartimento di medicina, epidemiologia, igiene del lavoro ed ambientale, 00078 Monte Porzio Catone  
13 (Roma), Italy; p.tomao@inail.it

14 <sup>5</sup> Laboratorio Tecnologie Diagnostiche Innovative Area Biologia Molecolare, Istituto Zooprofilattico  
15 Sperimentale della Sicilia, Via Rocco Dicillo 3, 90129 Palermo, Italy; stefano.reale@izssicilia.it

16 <sup>6</sup> Cancer Registry Unit, Fondazione IRCCS Istituto Nazionale dei Tumori, 20133 Milan, Italy;  
17 giovanna.tagliabue@istitutotumori.mi.it

18 <sup>7</sup> Respiratory Disease Unit, Fondazione IRCCS Istituto Nazionale Tumori, 20133 Milan, Italy;  
19 roberto.boffi@istitutotumori.mi.it

20 <sup>8</sup> Epidemiology and Prevention Unit, Fondazione IRCCS Istituto Nazionale dei Tumori, 20133 Milan, Italy;  
21 vittorio.krogh@istitutotumori.mi.it

22 <sup>9</sup> Department of Health Promotion, Mother and Child Care, Internal Medicine and Medical Specialties  
23 (PROMISE) "G. D'Alessandro" – University of Palermo, 90127 Palermo, Italy; walter.mazzucco@unipa.it

24 <sup>10</sup> Regional Reference Laboratory of West Sicily for the Emergency of COVID-19, Clinical Epidemiology Unit,  
25 University Hospital "Paolo Giaccone", 90127 Palermo, Italy;

26 <sup>11</sup> Division of Biostatistics and Epidemiology, Cincinnati Children's Hospital Medical Centre, Cincinnati, Ohio  
27 45229, USA

28 <sup>12</sup> International Society of Doctors for Environment (ISDE), 52100 Arezzo, Italy

29 \* Correspondence: alessandro.borgini@istitutotumori.mi.it; Tel.: +390223903536

30 \*\*SARS-CoV-2 and Environment Working Group: Alessandro Cau<sup>1</sup>, Viviana Perotti<sup>6</sup>, Vincenzo Restivo<sup>9,10</sup>,  
31 Claudio Costantino<sup>9,10</sup>, Giuseppe Lanza<sup>9</sup>, Maurizio Zarcone<sup>10</sup>, Adalberto Cavalleri<sup>8</sup>, Chiara Veronese<sup>7</sup>,  
32 Cinzia De Marco<sup>13</sup>, Ario Ruprecht<sup>7</sup>

33 <sup>13</sup> Biomarkers Unit, Fondazione IRCCS Istituto Nazionale dei Tumori, 20133 Milan, Italy;

34 **Abstract:** Exposure to atmospheric particulate matter and nitrogen dioxide has been  
35 linked to SARS-CoV-2 infection and death. We hypothesized that an interaction between  
36 SARS-CoV-2 infection and exposure to farming-related atmospheric pollutants worsens  
37 the effect of SARS-CoV-2 on mortality. Our objective was investigate this hypothesis by  
38 performing an ecological study in five Italian Regions (Piedmont, Lombardy, Veneto,  
39 Emilia-Romagna and Sicily) linking all-cause mortality, by province (administrative  
40 entities within regions), to atmospheric particulate matter (PM<sub>2.5</sub> and PM<sub>10</sub>) nitrous oxide  
41 (N<sub>2</sub>O), ammonia (NH<sub>3</sub>) and methane (CH<sub>4</sub>) mainly produced by agricultural activities.  
42 Study outcome was change in all-cause mortality during March-April 2020, compared to  
43 March-April 2015-2019 (period) as assessed by mortality rate ratios (MRRs) estimated  
44 using multivariate negative binomial regression models that adjusted for air  
45 temperature, humidity and population density. The MRR for the interaction of period  
46 with NH<sub>3</sub> exposure, considering all pollutants together was 1.133, equivalent to a 13.3%

47 increase in mortality over and above that due to period (proxy for COVID-19 mortality)  
48 for each ton/km<sup>2</sup> increase in NH<sub>3</sub> emissions. Although the study was ecological, and did  
49 not provide evidence of a causal link between SARS-CoV-2 and farming-related  
50 pollutants, in accord with the precautionary principle we recommend application of  
51 measures to limit NH<sub>3</sub> exposure particularly while the COVID-19 pandemic continues.  
52

53 **Keywords:** particulate matter; SARS-CoV-2; mortality; pollution; ammonia; methane;  
54 nitrous oxide; farming; livestock

### 55 1. Introduction

56 According to the World Health Organization, on March 31, 2021, worldwide there  
57 were 128,540,982 confirmed cases of SARS-CoV-2 infection (COVID-19) and 2,808,308  
58 deaths (2.18% of confirmed cases) [1]. The corresponding figures for Italy were 3,584,899  
59 confirmed cases and 109,346 (3.5%) deaths [1]. These are likely to be underestimates [2].

60 Several studies have investigated effects of environmental and meteorological  
61 factors on the dissemination and severity of viral respiratory infections [3-6]. A 2018  
62 paper provided evidence that air pollution from coal burning had exacerbated the  
63 “Spanish flu” pandemic of 1918 [7]. Although most COVID-19 patients develop mild or  
64 no symptoms, more severe and life-threatening symptoms such as pneumonia (often  
65 leading to acute respiratory distress syndrome), vascular inflammation and thrombosis,  
66 myocarditis, and cardiac arrhythmia, also occur, typically associated with excessive  
67 inflammation and cytokine storm [8].

68 Long-term and short-term exposure to atmospheric particulate matter  $\leq 10 \mu\text{m}$   
69 (PM<sub>10</sub>) and  $\leq 2.5 \mu\text{m}$  (PM<sub>2.5</sub>) have been linked to respiratory and cardiovascular events [9].  
70 A recent US study found that an increase of just 1  $\mu\text{g}/\text{m}^3$  in long-term exposure to PM<sub>2.5</sub>  
71 was associated with an 8% increase in the COVID-19 death rate [10]. Studies in Italy  
72 have identified associations between COVID-19 and COVID-19-related death and  
73 exposure to PM<sub>10</sub> and PM<sub>2.5</sub> [11-14]; while tropospheric nitrogen dioxide (NO<sub>2</sub>) in  
74 northern Italy was associated with levels of SARS-CoV-2 infection [15]. The COVID-19  
75 pandemic in Italy started in the Po Valley of northern Italy – one of the most polluted  
76 areas in the world [16] – where intensive livestock rearing and heavy use of fertilizers  
77 make major contributions to atmospheric pollution [17]. In December 2019 in the Po  
78 Valley Regions of Lombardy, Piedmont, Emilia-Romagna and Veneto, there were,  
79 respectively, 1,543,639, 824,801, 627,627 and 824,112 cattle, and 3,984,633, 1,121,723,  
80 1,377,527, and 717,557 pigs. In comparison, the island Region of Sicily had 387,619 cattle  
81 and 45,152 pigs [18]. As regards nitrogen fertilizer use, the 2019 figures (tonne/km<sup>2</sup>/year)  
82 were 12.92 in Lombardy, 8.27 in Piedmont, 18.64 in Veneto, and 19.50 in Emilia-  
83 Romagna, compared to 5.20 in Sicily [18].

84 Agricultural activity produces NH<sub>3</sub>, CH<sub>4</sub> and N<sub>2</sub>O, and also PM<sub>10</sub> and PM<sub>2.5</sub> [19-21].  
85 In Italy, agriculture is the main source of NH<sub>3</sub> emissions, with an estimated 362.18  
86 kilotonnes/year, accounting for 94.3% of the total [19]. In Lombardy in 2017 (latest year  
87 for which figures are available) the proportion of NH<sub>3</sub> emissions from agriculture varied  
88 by province (68-99%), as did the proportions of CH<sub>4</sub> and N<sub>2</sub>O emissions (7-87% and 27-  
89 94%, respectively) [22].

90 Analysis of all-cause mortality data indicates that COVID-19-related deaths are  
91 underestimated [2;23]. A study that analysed 22 countries reported that in Italy COVID-

92 19-related deaths were underestimated by 30% with similar underestimates in several  
93 other countries [24]. For this reason all-cause mortality is the epidemiologic indicator of  
94 choice for assessing the mortality impact of COVID-19 [2;25-26] from which excess  
95 deaths can be estimated as proxy of COVID-19 mortality [25].

96 We hypothesized that long-term exposure to farming-related air pollutants might  
97 predispose to increased risk of COVID-19-related death. To do this we performed the  
98 preliminary investigation presented in this work: this was an ecological study, firstly to  
99 find out whether the results justified additional analytic studies. Secondly because there  
100 was a possibility of identifying modifiable risk factors to limit the effect of the COVID-19  
101 on mortality.

## 102 **2. Materials and Methods**

### 103 *2.1. Study Design*

104 We conducted an ecological study to investigate whether interaction between  
105 SARS-CoV-2 infection and exposure to farming-related air pollutants worsened the  
106 effect of SARS-CoV-2 on mortality at the level of the Provinces (administrative entities  
107 within Regions) in the Italian Regions of Lombardy, Emilia-Romagna, Piedmont,  
108 Veneto, and Sicily. We investigated the period of the first COVID-19 wave (March-April  
109 2020) in comparison with the same two-month period in the years 2015 to 2019.  
110 Mortality differences between these two periods are a good proxy for mortality due to  
111 COVID-19.

### 112 *2.2. Pollutant Exposure*

113 We assessed atmospheric PM<sub>2.5</sub>, PM<sub>10</sub>, N<sub>2</sub>O, NH<sub>3</sub>, CH<sub>4</sub> and NO<sub>2</sub>. The first five were  
114 included because they are linked to farming; NO<sub>2</sub> was included because it could be a  
115 confounder or effect modifier. Atmospheric PM<sub>2.5</sub>, PM<sub>10</sub> and NO<sub>2</sub> levels are measured by  
116 monitoring stations and the data archived by Regional Environmental Protection  
117 Agencies (ARPAs) [27-31]. We accessed ARPA data from the monitoring stations in the  
118 chief towns of each Province and used them as proxies for exposure of the entire  
119 provincial populations. We averaged daily concentrations of over 2019 to arrive at  
120 estimates of long-term exposure. However for PM<sub>10</sub> and NO<sub>2</sub> we had use the latest  
121 available data (2015) for one province, and used the data from an adjacent province in  
122 another province. We did not use 2020 data, as they could have biased estimates because  
123 of changes in pollutant levels caused by lockdown [32;33].

124 NH<sub>3</sub> concentrations are monitored by too few stations to be representative of the  
125 areas being studied; and levels of CH<sub>4</sub> and N<sub>2</sub>O are not measured routinely. We  
126 therefore estimated levels of atmospheric NH<sub>3</sub>, CH<sub>4</sub> and N<sub>2</sub>O, again at the level of the  
127 provinces. These estimates were derived from estimates produced by the ARPAs [22;31].

128 ARPAs estimate NH<sub>3</sub> emissions for each province and for each known source (e.g.  
129 pigs) by multiplying the average number pigs per year present in the province by an  
130 estimate of the average production by each animal (as kg NH<sub>3</sub>/animal/year). A similar  
131 method is applied to each type of livestock present, and also other NH<sub>3</sub> sources (e.g.  
132 fertilizer use). Total NH<sub>3</sub> emissions are obtained by summing estimate emissions from all  
133 known sources. Similar methods are used to estimate emissions of CH<sub>4</sub> and N<sub>2</sub>O.

134 We next derived provincial exposure indices from the ARPA estimates by dividing  
135 the total estimated quantities of emissions (tonne/year) by the area (km<sup>2</sup>) of the province,  
136 thereby taking account of variations in province area. We used data for the latest  
137 available year as proxy for long-term exposure: 2017 for Lombardy and Emilia-Romagna

138 (except for one province for which data were for 2016), 2015 for Piedmont and Veneto,  
139 and 2012 for Sicily.

140 Backes et al. [34] showed that the atmospheric concentration patterns of NH<sub>3</sub> are in  
141 line with NH<sub>3</sub> emission patterns, indicating the provincial exposure indices are  
142 acceptable indicators of atmospheric NH<sub>3</sub>. To further investigate provincial exposure  
143 indices as indicators of atmospheric pollution levels we assessed correlations (Pearson's  
144  $r$ ) between NH<sub>3</sub> emissions and cattle numbers, pig numbers and fertilizer use per km<sup>2</sup> by  
145 region. We could only compare data at the regional level because of the unavailability of  
146 data on numbers of pigs and cattle and nitrogen fertilizer use at the provincial level,  
147  
148

### 149 2.3. Meteorological Variables

150 We hypothesized that temperature influenced COVID-19 rates over the short-term  
151 and so might have an effect on mortality. We therefore used temperature and humidity,  
152 as measured by ARPA monitoring stations in the main town of each province, as proxies  
153 for the average temperature and average relative humidity in each province, in March  
154 and April in 2020, and also in March-April 2019.

### 155 2.4. Additional covariates

156 Educational level is a potential risk factor for SARS-CoV2 infection and death [35].  
157 We therefore downloaded provincial data on educational level from ISTAT [36] (as  
158 proportion of people who continued schooling after 14 years of age) and added these as  
159 covariates to the models. Social deprivation is also linked to SARS-CoV-2 infection and  
160 death [37]. However social deprivation indices at the provincial level were not available  
161 so we assumed that educational level was an approximate proxy for social deprivation.  
162 Income is also a component of social deprivation but was not available at provincial  
163 level so we accessed regional level data from ISTAT [40] and assessed correlations  
164 (Pearson's  $r$ ) with NH<sub>3</sub> by regions to provide indications as to the possible effects of  
165 income on our findings.

166 High body mass index (BMI) and diabetes are recognized as major risk factors for  
167 SARS-CoV2 death [38;39] and could bias estimates of links between farming-related  
168 pollutants and SARS-CoV-2 mortality. Provincial level data were unavailable, so we  
169 accessed regional level data from ISTAT [40] and assessed correlations (Pearson's  $r$ ) with  
170 NH<sub>3</sub> to provide indications as to the possible effects of BMI and diabetes on our findings.

171 Variation in lockdown periods across provinces could also bias the results of a  
172 study like this. However in Italy during the first COVID-19 wave, days of lockdown  
173 were closely similar throughout the country. Similarly, regulations to limit contagion  
174 (mask-wearing, social distancing) applied to the whole country during the two-month  
175 study period.

### 176 2.5. Outcome

177 All-cause daily mortality data, provided by the Italian National Statistics Institute  
178 (ISTAT) [41], was primary study outcome. Mortality data are available by municipality  
179 (administrative entities within provinces). We calculated total mortality by province, for  
180 March-April 2020, as the sum of the daily death counts in all the municipalities in each  
181 province. We also estimated average mortality in March-April of 2015-2019, as the

182 average, over the five years, of the sum of daily death counts in all the municipalities of  
183 each province.

### 184 2.6. Statistical Methods

185 We first sought correlations (Pearson's  $r$ ) between levels of the atmospheric  
186 pollutants being studied ( $PM_{2.5}$ ,  $PM_{10}$ ,  $N_2O$ ,  $NH_3$ ,  $CH_4$  and  $NO_2$ ). We next analyzed  
187 associations between changes in total mortality from March-April 2015-2019 to 2020 and  
188 atmospheric pollutant levels, humidity, temperature, and population density (study  
189 covariates). To do this we used negative binomial regression models, that included a  
190 population size offset, and which estimated mortality rate ratios (MRRs) in relation to  
191 study covariates. MRR is the ratio of the mortality rate for a specific value of a covariate  
192 relative to reference. Thus, for the covariate "period" MRR is mortality in March-April  
193 2020 relative to mortality in March-April in 2015-2019, and is a good proxy for the  
194 increase in mortality due to COVID-19. We were particularly interested in MRRs for the  
195 interaction between period and the other covariates (mainly pollutant levels) as these are  
196 an estimate of the mortality associated with the pollutant over and above that due to  
197 COVID-19 alone.

198 We first ran basic models that included period, one covariate, and an interaction  
199 term between period and covariate. We next ran complete models that included all  
200 covariates, and all interaction terms between period and covariates.

201 Information on  $PM_{10}$  levels was available for all provinces, while  $PM_{2.5}$  data were  
202 unavailable for six provinces. We therefore ran two sets of models, one that included all  
203 45 provinces but excluded  $PM_{2.5}$ , and another that included  $PM_{2.5}$  and the 39 provinces  
204 for which  $PM_{2.5}$  was available. The R statistical package [42], version 4.0.2 was used to  
205 perform the analyses.

## 206 3. Results

207 Supplementary Table S1 lists the provinces included in the study, together with  
208 their populations, population densities. Compared to mortality in March-April 2015-  
209 2019, mortality in March-April 2020 varied from a 1.8% decrease in Agrigento Province  
210 (Sicily) to a 364.3% increase in Bergamo (Lombardy). Mean values of atmospheric  $PM_{10}$ ,  
211  $PM_{2.5}$  and  $NO_2$  across provinces were 26.01, 17.58 and 25.23  $\mu g/m^3$  respectively; the  $PM_{10}$   
212 ranged from 14.0 (Verbano-Cusio-Ossola, Piedmont) to 35.2  $\mu g/m^3$  (Cremona,  
213 Lombardy), the  $PM_{2.5}$  ranged from 8.0 (Enna, Sicily) to 26.1  $\mu g/m^3$  (Cremona, Lombardy),  
214 and the  $NO_2$  ranged from 4.0 (Agrigento, Sicily) to 45.7  $\mu g/m^3$  (Monza Brianza,  
215 Lombardy).

216 As regards emissions, mean across-province exposure index estimates for  $NH_3$ ,  $CH_4$   
217 and  $N_2O$  were 2.22, 9.76, and 0.36 tonne/km<sup>2</sup>/year, respectively. The  $NH_3$  exposure index  
218 ranged from 0.12 (Verbano-Cusio-Ossola, Piedmont) to 10.3 tonne/km<sup>2</sup>/year (Cremona,  
219 Lombardy); the  $CH_4$  index ranged from 1.47 (Sondrio, Lombardy) to 33.17  
220 tonne/km<sup>2</sup>/year (Milan, Lombardy), and the  $N_2O$  index ranged from 0.06 (Verbano-  
221 Cusio-Ossola, Piedmont) to 1.12 tonne/km<sup>2</sup>/year (Cremona, Lombardy).

222 Table 1 shows Pearson correlation coefficients for atmospheric pollutants  $PM_{10}$ ,  
223  $PM_{2.5}$ ,  $NO_2$ ,  $NH_3$ ,  $CH_4$ , and  $N_2O$ .

224  
225  
226  
227

228

**Table 1.** Pearson’s correlation coefficients between atmospheric pollutants

| Air pollutant     | PM <sub>10</sub> | PM <sub>2.5</sub> | NO <sub>2</sub> | NH <sub>3</sub> | CH <sub>4</sub> | N <sub>2</sub> O |
|-------------------|------------------|-------------------|-----------------|-----------------|-----------------|------------------|
| PM <sub>10</sub>  | 1.00             | 0.84              | 0.52            | 0.51            | 0.51            | 0.57             |
| PM <sub>2.5</sub> | 0.84             | 1.00              | 0.60            | 0.46            | 0.48            | 0.61             |
| NO <sub>2</sub>   | 0.52             | 0.60              | 1.00            | 0.27            | 0.64            | 0.37             |
| NH <sub>3</sub>   | 0.51             | 0.46              | 0.27            | 1.00            | 0.68            | 0.92             |
| CH <sub>4</sub>   | 0.51             | 0.48              | 0.64            | 0.68            | 1.00            | 0.80             |
| N <sub>2</sub> O  | 0.57             | 0.61              | 0.37            | 0.92            | 0.80            | 1.00             |

229

230

231

232

233

234

235

Table 2 presents modelling results for all 45 provinces included in the study: the MRRs represent percentage increases in overall death rate in relation to increments of 1 µg/m<sup>3</sup> in PM<sub>10</sub>, and NO<sub>2</sub>, 1 tonne/km<sup>2</sup> increments in NH<sub>3</sub>, CH<sub>4</sub> and N<sub>2</sub>O, a 1°C increment in atmospheric temperature, a 1% increment in relative humidity, a one unit increase in population density, or in people who continued schooling after 14 years of age compared to those who attended only up to 14 years.

236

237

**Table 2.** Mortality rate ratios (MRRs)\* with 95% confidence intervals (CI) for all 45 Italian provinces included in the study.

| Variable                                | MRR* (95%CI)             |                             |
|-----------------------------------------|--------------------------|-----------------------------|
|                                         | Basic model <sup>§</sup> | Complete model <sup>‡</sup> |
| PM <sub>10</sub>                        | 0.997 (0.981-1.013)      | 1.003 (0.985-1.021)         |
| PM <sub>10</sub> and period interaction | 1.027 (1.004–1.050)      | 0.995 (0.970–1.020)         |
| NO <sub>2</sub>                         | 0.996 (0.986-1.006)      | 1.000 (0.987-1.013)         |
| NO <sub>2</sub> and period interaction  | 1.025 (1.010-1.040)      | 1.017 (0.999-1.037)         |
| NH <sub>3</sub>                         | 0.992 (0.958-1.029)      | 0.997 (0.909-1.088)         |
| NH <sub>3</sub> and period interaction  | 1.094 (1.040-1.151)      | 1.133 (1.003–1.281)         |
| N <sub>2</sub> O                        | 0.882 (0.623-1.266)      | 0.721 (0.249-2.91)          |
| N <sub>2</sub> O and period interaction | 2.195 (1.340-3.595)      | 0.243 (0.056-1.128)         |
| CH <sub>4</sub>                         | 0.994 (0.982-1.007)      | 1.012 (0.984-1.041)         |
| CH <sub>4</sub> and period interaction  | 1.032 (1.015-1.051)      | 1.043 (1.001-1.087)         |
| Temperature                             | 0.983 (0.901-1.072)      | 0.996 (0.928-1.070)         |
| Temperature and period interaction      | 0.961 (0.839-1.102)      | 0.980 (0.881–1.090)         |
| Humidity                                | 1.003 (0.990 -1.016)     | 1.002 (0.989-1.015)         |

|                                           |                     |                     |
|-------------------------------------------|---------------------|---------------------|
| Humidity and period interaction           | 0.995 (0.978-1.012) | 0.987 (0.970-1.003) |
| Population density                        | 1.000 (0.999-1.001) | 1.000 (0.999-1.001) |
| Population density and period interaction | 1.000 (0.999-1.001) | 1.000 (0.999-1.001) |
| Education                                 | 0.991 (0.965-1.019) | 1.004 (0.973-1.035) |
| Education and period interaction          | 1.022 (0.983-1.063) | 0.992 (0.950-1.036) |
| Period (2020 vs. 2015-2019)               | 1.739 (1.526-1.983) | 4.850 (0.30-78.881) |

\* MMRs are percentage increases in overall death rate associated with: 1  $\mu\text{g}/\text{m}^3$  increase in atmospheric  $\text{PM}_{10}$ ; 1  $\mu\text{g}/\text{m}^3$  increase in atmospheric  $\text{NO}_2$ ; 1 tonne/year/ $\text{km}^2$  increases in emissions of  $\text{NH}_3$ ,  $\text{CH}_4$  or  $\text{N}_2\text{O}$ ; 1°C increase in atmospheric temperature, 1% increase in relative humidity, one unit increase in population density, or in people who continued schooling after 14 years of age compared to those who attended only up to 14 years.

§ Basic models include only period, a single covariate and its interaction with period.

‡ Complete models include all covariates together with their interactions with period.

The basic regression models identified significantly increased MMRs for interactions between period and:  $\text{PM}_{10}$  (MRR: 1.027; 95%CI: 1.004–1.050),  $\text{NO}_2$  (MRR: 1.025; 95%CI: 1.010-1.040),  $\text{NH}_3$  (MRR: 1.094; 95%CI: 1.040-1.151),  $\text{N}_2\text{O}$  (MRR: 2.195; 95%CI: 1.340-3.595) and  $\text{CH}_4$  (MRR: 1.032; 95%CI: 1.015-1.051) indicating that high levels of these pollutants were significantly linked to an increase in total mortality over and above that due to period (proxy for presence of COVID-19). None of the individual covariates was significantly associated with MRR.

In the complete models, MRRs for the interaction between  $\text{CH}_4$  and period (MRR: 1.043; 95%CI: 1.001–1.087) and also for the interaction between  $\text{NH}_3$  and period (MRR: 1.133; 95%CI: 1.003–1.281) remained significant, indicating that an increase of 1 tonne/ $\text{km}^2$ /year in  $\text{NH}_3$  emissions was significantly associated with a 13.3% increase in all-cause death over and above that associated with period (proxy for COVID-19). MRRs for interaction of period with  $\text{PM}_{10}$ ,  $\text{N}_2\text{O}$  and  $\text{NO}_2$  all reduced, compared to the basic model, and became non-significant.

Table 3 shows results for the 39 provinces for which  $\text{PM}_{2.5}$  data were available. The MRRs were similar to those obtained for all 45 provinces, except that in the basic model, MRR for interaction between period and  $\text{PM}_{2.5}$  was significant, but for  $\text{PM}_{10}$  was not. As regards the complete models, only the MRR for interaction between period and  $\text{NH}_3$  was significant (1.145; 95%CI: 1.006–1.305) corresponding to a 14.5% increase (over and above that for period alone) in mortality for each tonne/ $\text{km}^2$ /year increase in  $\text{NH}_3$  emissions.

Correlation analysis found the following correlations: 0.92 between provincial exposure index for  $\text{NH}_3$  and number of pigs per  $\text{km}^2$ ; 0.96 between provincial exposure index for  $\text{NH}_3$  and number of cattle per  $\text{km}^2$ ; 0.53 between the provincial exposure index for  $\text{NH}_3$  and number of cattle per  $\text{km}^2$ . In addition correlations were: -0.87 between BMI and the provincial exposure index for  $\text{NH}_3$ ; and -0.77 between diabetes and the provincial exposure index for  $\text{NH}_3$ ; and 0.42 between yearly average income and the regional exposure index for  $\text{NH}_3$ . These findings suggest that emission levels are a reasonable surrogate for atmospheric levels. Given the strength of the association of

238  
239  
240  
241  
242  
243  
244  
245  
246  
247  
248  
249  
250  
251  
252  
253  
254  
255  
256  
257  
258  
259  
260  
261  
262  
263  
264  
265  
266  
267  
268  
269  
270  
271  
272  
273  
274

275  
276

COVID-related mortality increase (13.3%) due to NH<sub>3</sub>, it is unlikely that BMI, diabetes and income would have had biased this association.

277  
278

**Table 3.** Mortality rate ratios (MRRs)\* with 95% confidence intervals (CI). Analyses restricted to the 39 Italian provinces for which PM<sub>2.5</sub> data were available.

| Variable                                  | MRR (95%CI)              |                             |
|-------------------------------------------|--------------------------|-----------------------------|
|                                           | Basic model <sup>§</sup> | Complete model <sup>^</sup> |
| PM <sub>10</sub>                          | 0.996 (0.979-1.013)      | 1.006 (0.980-1.033)         |
| PM <sub>10</sub> and period interaction   | 1.021 (0.997-1.045)      | 0.989 (0.953-1.026)         |
| PM <sub>2.5</sub>                         | 0.994 (0.972-1.015)      | 0.997 (0.959-1.037)         |
| PM <sub>2.5</sub> and period interaction  | 1.034 (1.003-1.066)      | 1.011 (0.957-1.068)         |
| NO <sub>2</sub>                           | 0.994 (0.983-1.005)      | 0.998 (0.983-1.013)         |
| NO <sub>2</sub> and period interaction    | 1.021 (1.005-1.039)      | 1.018 (0.996-1.040)         |
| NH <sub>3</sub>                           | 0.991 (0.956-1.029)      | 0.996 (0.900-1.092)         |
| NH <sub>3</sub> and period interaction    | 1.082 (1.027-1.139)      | 1.145 (1.006-1.305)         |
| N <sub>2</sub> O                          | 0.866 (0.606-1.255)      | 0.724 (0.239-2.339)         |
| N <sub>2</sub> O and period interaction   | 1.943 (1.174-3.212)      | 0.238 (0.049-1.125)         |
| CH <sub>4</sub>                           | 0.994 (0.981-1.007)      | 1.011 (0.983-1.042)         |
| CH <sub>4</sub> and period interaction    | 1.028 (1.009-1.046)      | 1.039 (0.995-1.084)         |
| Temperature                               | 0.980 (0.883-1.087)      | 1.003 (0.916- 1.097)        |
| Temperature and period interaction        | 1.010 (0.858-1.187)      | 0.980 (0.853-1.128)         |
| Humidity                                  | 1.005 (0.989-1.022)      | 1.004 (0.990- 1.019)        |
| Humidity and period interaction           | 1.003 (0.983-1.023)      | 0.972 (0.972-1.008)         |
| Population density                        | 1.000 (0.999-1.001)      | 1.000 (0.999-1.001)         |
| Population density and period interaction | 1.000 (0.999-1.001)      | 1.000 (0.999-1.001)         |
| Education                                 | 0.986 (0.957-1.016)      | 1.003 (0.968-1.039)         |
| Education and period interaction          | 1.004 (0.962-1.048)      | 0.990 (0.943-1.039)         |
| Period (2020 year vs. 2015-2019)          | 1.846 (1.611-2.116)      | 4.246 (0.16-112.134)        |



\* MMRs: percentage increases in overall death rate associated with: 1  $\mu\text{g}/\text{m}^3$  increase in atmospheric particulate matter ( $\text{PM}_{2.5}$  or  $\text{PM}_{10}$ ); 1  $\mu\text{g}/\text{m}^3$  increase in atmospheric  $\text{NO}_2$ ; 1 tonne/ $\text{km}^2$ /year increases  $\text{NH}_3$ ,  $\text{CH}_4$  or  $\text{N}_2\text{O}$  emissions; 1°C increase in atmospheric temperature, 1% increase in relative humidity, one unit increase in population density, or people who continued schooling after 14 years of age compared to those who attended only up to 14 years. § Basic models include only period, a single covariate and its interaction with period.^ Complete models include all covariates and their interactions with period.

#### 4. Discussion

Using basic models, which excluded most covariates, we found that higher  $\text{NH}_3$ ,  $\text{CH}_4$ , and  $\text{N}_2\text{O}$  emissions – whose major source is agriculture – were associated with all-cause mortality increases in 2020, compared to previous years, over and above those due to period (proxy for COVID-19–related mortality). Higher  $\text{PM}_{10}$ ,  $\text{PM}_{2.5}$  and  $\text{NO}_2$  were also associated with all-cause mortality increases over and above those due to period.

Using complete models, that included all other studied pollutants as covariates, higher  $\text{NH}_3$  levels remained associated with a significant all-cause mortality increase: a one tonne/ $\text{km}^2$  increase in  $\text{NH}_3$  was associated with a 13.3% increase in mortality over and above that due to period. High  $\text{CH}_4$  levels also remained associated with a significant all-cause mortality increase in the complete model that includes all provinces, but not in the complete model that only included provinces for which for which  $\text{PM}_{2.5}$  data were available.

The fact that interactions of period with  $\text{N}_2\text{O}$ ,  $\text{PM}_{10}$ ,  $\text{PM}_{2.5}$  (and to some extent  $\text{CH}_4$ ) were not associated with excess mortality in the complete models is likely due to the fact that levels of these pollutants correlated highly with each other.

A major study assumption was that the provincial exposure index based on pollutant emissions is a good proxy for levels of that pollutant in the atmosphere. This assumption is supported by the study of Backes et al. [34] which showed that atmospheric concentration patterns of  $\text{NH}_3$  are in line with  $\text{NH}_3$  emission patterns. To further investigate provincial exposure indices as indicators of atmospheric pollution levels we assessed correlations (Pearson's  $r$ ) between  $\text{NH}_3$  emissions and cattle numbers, pig numbers and nitrogen fertilizer use, per  $\text{km}^2$ , by region (provincial data unavailable): we found high or good correlations (0.96, 0.92 and 0.53, respectively) indicating that estimated emissions are consistent with the emission sources present, and suggesting that these estimated emissions (standardized by area size) are a reasonable proxy for atmospheric  $\text{NH}_3$  concentrations.

It is known that BMI and diabetes are major risk factors for COVID-19 infection and death. However provincial data for BMI and diabetes were not available and could not be included in our models as covariates. We indirectly assessed whether the association between farming-related pollutants and SARS-CoV-2 mortality were biased by BMI, diabetes and income by estimating correlations between BMI and  $\text{NH}_3$ , between diabetes and  $\text{NH}_3$ , and between income  $\text{NH}_3$  at the regional level. As noted, given the strength of the association of COVID-related mortality increase (13.3%) due to  $\text{NH}_3$ , it is unlikely that BMI, diabetes and income would exerted a major bias on this association. Any influence of population density and educational level on associations was taken account of by entering these as covariates in the models.

To our knowledge this is the first study to investigate relationships between farming-related atmospheric pollution and COVID-19-related mortality. However, a 2020 study conducted in Italy found that the number of SARS-CoV-2 infections per unit population depended on the type of rural landscape [43]. The study classified rural

327 landscapes into: (A) urban and periurban with high intensity agriculture; (B) high  
328 intensity agriculture; (C) medium intensity agriculture (hilly areas), (D) low intensity  
329 agriculture (high hills and mountains). They found that areas of less intense agriculture  
330 (C, D) had fewer COVID-19 cases (per 10,000 inhabitants) than areas of intensive  
331 agriculture (A and B). Notwithstanding the markedly different methodologies, both our  
332 study and [43] identified intensive farming as a risk factor for COVID-19.

333 Similarly, the 2020 Lancet Countdown report highlighted a link between SARS-  
334 CoV-2 infection, environmental degradation and climate change; and identified  
335 agriculture one of the main sources of pollutant emissions [44].

336 Other studies have reported associations between exposure to livestock farming  
337 and respiratory diseases. Thus, a Netherlands study found that people living in high  
338 livestock density areas had a significantly higher prevalence of pneumonia than those  
339 living in low density areas [45]. A German study [46] found that people exposed to  
340 higher levels of NH<sub>3</sub> had poorer pulmonary health and were more likely to be sensitized  
341 to ubiquitous allergens, than persons with lower NH<sub>3</sub> exposure. A study performed in  
342 an agricultural region of Washington State (US) found that industrial-scale animal  
343 feeding operations were associated with higher daily outdoor NH<sub>3</sub> levels, and that  
344 forced expiratory volume in 1 second was lower with each interquartile increase in the  
345 previous day's NH<sub>3</sub> exposure; however no associations with asthma symptoms were  
346 observed [47]. The European Academy of Allergy and Clinical Immunology position  
347 paper [48] has highlighted that increased risks of developing the respiratory diseases  
348 and allergies are associated with animal farming, and emphasized the need to protect  
349 workers from such risks.

350 The data provided by the above cited-studies [45-48] suggests that a link between  
351 excess COVID-19-related mortality and farming-related atmospheric pollutants is  
352 biologically plausible. The specific association we found between COVID-19-related  
353 mortality and NH<sub>3</sub> might be explained by the hypothesis that atmospheric NH<sub>3</sub> leads to  
354 the formation of alkaline aerosol which triggers a conformation change in the SARS-  
355 CoV-2 spike that facilitates fusion of the viral envelope with the plasma membrane of  
356 target cells [49]. It is noteworthy that clusters of SARS-CoV-2 infection have been  
357 reported in association with slaughterhouses [50] which are known to have elevated  
358 levels of NH<sub>3</sub> [51].

359 We used change in all-cause total mortality in 2020 as a proxy for SARS-CoV-2  
360 mortality, and to our knowledge our study is the first to do this. A strength of this  
361 approach is that it avoids loss of deaths due to underreporting of SARS-CoV-2 mortality  
362 [25]. However the pandemic may have stressed health resources so that more people  
363 than usual may have died from non-COVID-19 causes, somewhat inflating all-cause  
364 mortality. The main limitations of the study are that, for atmospheric pollutants that  
365 were measured, we used levels measured at the monitoring station in the chief town of  
366 the province as proxy for exposure of the entire provincial population. In addition, for  
367 the atmospheric pollutants NH<sub>3</sub> CH<sub>4</sub> and N<sub>2</sub>O, measured levels were not available and  
368 we used estimated emissions at the provincial level obtained from the regional  
369 environmental protection agencies, as proxies for exposure of the provincial  
370 populations.

## 371 5. Conclusions

372 Although the study was ecological, and could not identify causal links between  
373 farming-related atmospheric pollutants and COVID-19 mortality, it suggests that studies  
374 to further address this issue would be worthwhile, particularly since other data also

375 indicate links between farming-derived pollutants and worsened outcomes of SARS-  
376 CoV-2 and other viral infections.

377 The agricultural sector is responsible for most NH<sub>3</sub> emissions [19]. In view of the  
378 continuing severity of the SARS-CoV-2 pandemic it is important to implement measures  
379 that can speedily reduce NH<sub>3</sub> emissions from agriculture, for example by covering tanks  
380 containing slurry [53]. However over the medium term structural changes are required  
381 to reduce farming-related pollution. Consumption of meat, particularly red meat, is  
382 recognized as a threat to human health and wellbeing in part because of the effect of  
383 livestock rearing on the environment, as documented the 2020 Lancet Countdown  
384 Report [44]. The desire to consume meat encourages the use of intensive farming  
385 resulting in increase emission of farming-related pollutants. As urged by the Lancet  
386 Report [44] and by Agnoletti et al. [43] we need to move towards more sustainable  
387 agriculture with reduced livestock raising. Finally we note that intensive agriculture is  
388 also a major cause of biodiversity loss worldwide, which has been implicated in the  
389 emergence of SARS-CoV-2 and other viruses [44;52].

390 **Author Contributions:** Conceptualization, P.C. and W.M.; Methodology, PC; Validation, A.A.,  
391 G.C., A.B., M.B., P.T., M.C.D., S.R., S.S., G.T., R.B., V.K., F.T., C.M.M., V.R., C.C., G.L., A.C., A.R.,  
392 C.V., C.D.M.; Formal Analysis, P.C., V.P., M.Z.; Investigation, P.C., A.B., M.B., A.C.; Writing –  
393 Original Draft Preparation, P.C., W.M.; Writing – Review & Editing, all authors; Supervision, P.C.,  
394 W.M.; Project Administration, P.C. All authors have read and agreed to the published version of  
395 the manuscript.

396 **Funding:** This research received no external funding

397 **Informed Consent Statement:** This study used only aggregated data available on web-  
398 sites accessible to the public.

399 **Data Availability Statement:** This study we used only aggregated data available on  
400 web-sites accessible to the public.

401 **Acknowledgments:** The authors thank Don Ward for help with the English and for a  
402 critical reading of the manuscript.

403 **Conflicts of Interest:** The authors declare no conflicts of interest.

## 404 References

- 405 1. WHO Coronavirus Disease (COVID-19): <https://covid19.who.int> (archived on 31 March 2021).
- 406 2. Raleigh, V.S. UK's record on pandemic deaths. *BMJ* **2020**, *370*:m3348. doi: 10.1136/bmj.m3348. PMID: 32887679
- 407 3. Rader, B., Scarpino, S.V., Nande, A., Hill, A.L., Adlam, B., Reiner, R.C., Pigott, D.M., Gutierrez, B., Zarebski, A.E., Shrestha, M.  
408 et al. Crowding and the shape of COVID-19 epidemics. *Nat Med* **2020**, *26*, 1829–1834. doi: 10.1038/s41591-020-1104-0.
- 409 4. Chen, G., Zhang, W., Li, S., Williams, G., Liu, C., Morgan, G.G., Jaakkola, J.J.K., Guo, Y. Is short-term exposure to ambient fine  
410 particles associated with measles incidence in China? A multi-city study. *Environ Res.* **2017**, *156*, 306-311. doi:  
411 10.1016/j.envres.2017.03.046
- 412 5. Cui, Y., Zhang, Z.F., Froines, J., Zhao, J., Wang, H., Yu, S.Z., Detels, R. Air pollution and case fatality of SARS in the People's  
413 Republic of China: an ecologic study. *Environ Health* **2003**, *2*(1):15. doi 10.1186/1476-069X-2-15
- 414 6. Contiero, P., Boffi, R., Tagliabue, G., Scaburri, A., Tittarelli, A., Bertoldi, M., Borgini, A., Favia, I., Ruprecht, A.A., Maiorino, A.  
415 et al. A Case-Crossover Study to Investigate the Effects of Atmospheric Particulate Matter Concentrations, Season, and Air  
416 Temperature on Accident and Emergency Presentations for Cardiovascular Events in Northern Italy. *Int J Environ Res Public*  
417 *Health* **2019**, *16*(23), 4627. doi: 10.3390/ijerph16234627
- 418 7. Clay, K., Lewis J., Severini, E. Pollution, Infectious Disease, and Mortality: Evidence from the 1918 Spanish Influenza  
419 Pandemic. *The Journal of Economic History* **2018**, 1179-1209. doi:10.1017/S002205071800058X
- 420 8. Hu, B., Huang, S., Yin, L. The cytokine storm and COVID-19. *J. Med. Virol.* **2021**, *93*, 250-256 . doi: 10.1002/jmv.26232

- 421 9. Requia, W.J., Adams, M.D., Arain, A., Papatheodorou, S., Koutrakis, P., Mahmoud, M. Global Association of Air Pollution  
422 and Cardio respiratory Diseases: A Systematic Review, Meta-Analysis, and Investigation of Modifier Variables. *Am. J. Public*  
423 *Health* **2018**, 108, S123-S130 doi: 10.2105/AJPH.2017.303839
- 424 10. Wu, X., Nethery, R.C., Sabath, B.M., Braun, D., Dominici, F. Exposure to air pollution and COVID-19 mortality in the United  
425 States: A nationwide cross-sectional study. *MedRxiv* **2020**, doi: 10.1101/2020.04.05.20054502
- 426 11. Accarino, G., Lorenzetti, S., Aloisio, G., Assessing correlations between short-term exposure to atmospheric pollutants and  
427 COVID-19 spread in all Italian territorial areas. *Environ. Pollut.* **2020**, 15, 268(Pt A) doi: 10.1016/j.envpol.2020.115714
- 428 12. Coccia, M. How do low wind speeds and high levels of air pollution support the spread of COVID-19? *Atmos. Pollut. Res.*  
429 **2020**, 12(1), 437-445. doi: 10.1016/j.apr.2020.10.002
- 430 13. Setti, L., Passarini, F., De Gennaro, G., Barbieri, P., Licen, S., Perrone, M.G., Piazzalunga, A., Borelli, M., Palmisani, J., Di Gilio,  
431 A. et al. Potential role of particulate matter in the spreading of COVID-19 in Northern Italy: first observational study based on  
432 initial epidemic diffusion. *BMJ Open* **2020**, 10. doi: 10.1136/bmjopen-2020-039338
- 433 14. Coker, E.S., Cavalli, L., Fabrizi, E., Guastella, G., Lippo, E., Parisi, M.L., Pontarollo, N., Rizzati, M., Varacca, A., Vergalli, S. The  
434 Effects of Air Pollution on COVID-19 Related Mortality in Northern Italy. *Environ Resource Econ* **2020**, 76, 611-634. doi:  
435 10.1007/s10640-020-00486-1
- 436 15. Filippini, T., Rothman, K.J., Goffi, A., Ferrari, F., Maffei, G., Orsini, N., Vinceti, M. Satellite-detected tropospheric nitrogen  
437 dioxide and spread of SARS-CoV-2 infection in Northern Italy. *Sci Total Environ.* **2020**, 739. doi: 10.1016/j.scitotenv.2020.140278
- 438 16. Van Donkelaar, A., Martin, R.V., Brauer, M., Boys, B.L. Use of satellite observations for long-term exposure assessment of  
439 global concentrations of fine particulate matter. *Environ. Health Perspect.* **2015**, 123, 135-143. doi: 10.1289/ehp.1408646
- 440 17. Emissions from agriculture and their control potentials: [https://ec.europa.eu/environment/air/pdf/TSAP-AGRI-](https://ec.europa.eu/environment/air/pdf/TSAP-AGRI-20121129_v21.pdf)  
441 [20121129\\_v21.pdf](https://ec.europa.eu/environment/air/pdf/TSAP-AGRI-20121129_v21.pdf) (archived on 31 March 2021).
- 442 18. <http://dati.istat.it> (archived on 31 March 2021).
- 443 19. ISPRA: Emissioni di ammoniaca nell'ambiente. [https://annuario.isprambiente.it/sys\\_ind/159](https://annuario.isprambiente.it/sys_ind/159) (archived on 31 March 2021).
- 444 20. Lovarelli, D., Conti, C., Finzi, A., Bacenetti, J., Guarino, M., Describing the trend of ammonia, particulate matter and nitrogen  
445 oxides: The role of livestock activities in northern Italy during Covid-19 quarantine. *Environ Res.* **2020**, 191, 110048. doi:  
446 10.1016/j.envres.2020.110048
- 447 21. Bauer, S.E., Tsigaridis, K., Miller, R. Significant atmospheric aerosol pollution caused by world food cultivation. *Geophys.*  
448 *Res. Lett.* **2016**, 43, 5394-5400. doi:10.1002/2016GL068354
- 449 22. INEMAR (INventario Emissioni Aria). <http://www.inemar.eu/xwiki/bin/view/Inemar/WebHome> (archived on 31 March  
450 2021).
- 451 23. Rivera, R., Rosenbaum, J.E., Quispe, W. Excess mortality in the United States during the first three months of the COVID-19  
452 pandemic. *Epidemiol Infect* **2020**, 148:e264. doi: 10.1017/S0950268820002617.
- 453 24. Kung S, Doppen M, Black M, et al. Underestimation of COVID-19 mortality during the pandemic. *ERJ Open Res.* **2021**, 7,  
454 00766-2020. doi: 10.1183/23120541.00766-2020
- 455 25. Raleigh, V.S., Tackling UK's mortality problem: covid-19 and other causes. *BMJ* **2020**, Jun 11, 369:m2295. doi:  
456 10.1136/bmj.m2295.
- 457 26. Saglietto, A., D'Ascenzo, F., Cavarretta, E., Frati, G., Anselmino, M., Versaci, F., Biondi-Zoccai, G., De Ferrari, G.M. Excess all-  
458 cause mortality during COVID-19 outbreak: potential role of untreated cardiovascular disease. *Minerva Cardioangiol.* **2020**, Sep  
459 30. doi: 10.23736/S0026-4725.20.05349-9.
- 460 27. ARPA Lombardia: <https://www.arpalombardia.it/Pages/Aria/Richiesta-Dati.aspx> (archived on 31 March 2021).
- 461 28. ARPA Piemonte: <http://www.sistemapiemonte.it/cms/privati/ambiente-e-energia/servizi/510-qualita-dell-aria-in-piemonte>  
462 (archived on 31 March 2021).
- 463 29. ARPA Emilia-Romagna: [https://www.arpae.it/dettaglio\\_generale.asp?id=2921&idlivello=1637](https://www.arpae.it/dettaglio_generale.asp?id=2921&idlivello=1637) (archived on 31 March 2021).
- 464 30. ARPA Veneto: [https://www.arpa.veneto.it/arpavinforma/indicatori-ambientali/indicatori\\_ambientali/atmosfera/qualita-](https://www.arpa.veneto.it/arpavinforma/indicatori-ambientali/indicatori_ambientali/atmosfera/qualita-dell-aria)  
465 [dell-aria](https://www.arpa.veneto.it/arpavinforma/indicatori-ambientali/indicatori_ambientali/atmosfera/qualita-dell-aria) (archived on 31 March 2021).
- 466 31. ARPA Sicilia: <https://www.arpa.sicilia.it/temi-ambientali/aria/> (archived on 31 March 2021).
- 467 32. Altwayjiri, A., Soleimani, E., Moroni, S., Palomba, P., Borgini, A., De Marco, C., Ruprecht, A.A., Sioutas, C. The impact of  
468 stay-home policies during Coronavirus-19 pandemic on the chemical and toxicological characteristics of ambient PM2.5 in the  
469 metropolitan area of Milan, Italy. *Sci Total Environ.* **2020**, 14, 143582. doi: 10.1016/j.scitotenv.2020.143582.
- 470 33. Chauhan, A., Singh, R.P. Decline in PM2.5 concentrations over major cities around the world associated with COVID-19.  
471 *Environ. Res.* **2020**, 187, 109634. <https://doi.org/10.1016/j.envres.2020.109634>.
- 472 34. Backes, A.M., Aulinger, A., Bieser, J., Matthias, V., Quante, M. Ammonia emissions in Europe, part II: How ammonia  
473 emission abatement strategies affect secondary aerosols. *Atmospheric Environment* **2016**, 126, 153-161. doi:  
474 10.1016/j.atmosenv.2015.11.039.

- 475 35. Karmakar, M., Lantz, P.M., Tipirneni, R. Association of Social and Demographic Factors With COVID-19 Incidence and Death  
476 Rates in the US. *JAMA Netw Open* **2021** Jan 4;4(1):e2036462. doi:10.1001/jamanetworkopen.2020.36462.PMID: 33512520  
477 36. [http://dati-censimentopopolazione.istat.it/Index.aspx?DataSetCode=DICA\\_GRADOISTR1](http://dati-censimentopopolazione.istat.it/Index.aspx?DataSetCode=DICA_GRADOISTR1) (archived on 31 March 2021).  
478 37. Hawkins, R.B., Charles, E.J., Mehaffey, J.H. Socio-economic status and COVID-19-related cases and fatalities. *Public Health*,  
479 **2020**,189:129-134. doi: 10.1016/j.puhe.2020.09.016.  
480 38. Bello-Chavolla, O.M., Bahena-López, J.P., Antonio-Villa, N.E., Vargas-Vázquez, A., González-Díaz, A., Márquez-Salinas, A.,  
481 Fermín-Martínez, C.A., Jesús Naveja, J., Aguilar-Salinas, C.A. Predicting mortality due to SARS-CoV-2: A mechanistic score  
482 relating obesity and diabetes to COVID-19 outcomes in Mexico. *medRxiv* **2020**, 20072223. doi: 10.1101/2020.04.20.20072223  
483 39. Drucker, D.J.. Diabetes, obesity, metabolism, and SARS-CoV-2 infection: the end of the beginning. *Cell Metabolism* **2021**, 33(3),  
484 479-498. doi: 10.1016/j.cmet.2021.01.016  
485 40. <http://dati.istat.it> (archived on 31 March 2021).  
486 41. ISTAT. Report on impact of the COVID-19 epidemic on the total mortality. <https://www.istat.it/en/archivio/243805> (archived  
487 on 31 March 2021).  
488 42. R Development Core Team. R: A Language and Environment for Statistical Computing **2007**. <http://www.rproject.org>  
489 (archived on 31 March 2021).  
490 43. Agnoletti, M., Manganelli, S. Piras, F. Covid-19 and rural landscape: The case of Italy. *Landsc Urban Plan.* **2020**,204:103955. doi:  
491 10.1016/j.landurbplan.2020.103955  
492 44. Watts, N., Amann, M., Arnell, N., Ayeb-Karlsson, S., Beagley, J., Belesova, K., Boykoff, M., Byass, P., Cai, W., Campbell-  
493 Lendrum, D. et al. The 2020 report of The Lancet Countdown on health and climate change: responding to converging crises.  
494 *Lancet* **2020**, S0140-6736(20)32290-X. doi: 10.1016/S0140-6736(20)32290  
495 45. Baliatsas, C., Dückers, M., Smit, L., Heederik, D., Yzermans, J. Morbidity Rates in an Area with High Livestock Density: A  
496 Registry-Based Study Including Different Groups of Patients with Respiratory Health Problems. *Int J Environ Res Public Health*  
497 **2020**, 17(5), 1591. doi: 10.3390/ijerph17051591.  
498 46. Schulze, A., Römmelt, H., Ehrenstein, V., van Strien, R., Praml, G., Küchenhoff, H., Nowak, D., Radon, K. Effects on  
499 pulmonary health of neighboring residents of animal feeding operations: exposure assessed using optimized estimation  
500 technique. *Arch. Environ. Occup. Health* **2011**, 66, 146-154. doi: 10.1080/19338244.2010.539635  
501 47. Loftus, C., Afsharinejad, Z., Sampson, P., Vedal, S., Torres, E., Arias, G., Tchong-French, M., Karr, C. Estimated time-varying  
502 exposures to air emissions from animal feeding operations and childhood asthma. *Int J Hyg Environ Health* **2020**, 223(1), 187-  
503 198. doi: 10.1016/j.ijheh.2019.09.003.  
504 48. Sigsgaard, T.; Basinas, I., Doekes, G., de Blay, F., Folletti, I., Heederik, D., Lipinska-Ojrzanowska, A., Nowak, D., Olivieri, M.,  
505 Quirce, S., et al. Respiratory diseases and allergy in farmers working with livestock: a EAACI position paper. *Clin Transl*  
506 *Allergy* **2020**, 10:29. doi: 10.1186/s13601-020-00334-x.  
507 49. Manigrasso, M., Protano, C., Guerriero, E., Vitali, M., Avino, P. May SARS-CoV-2 Diffusion Be Favored by Alkaline Aerosols  
508 and Ammonia Emissions? *Atmosphere* **2020**, 11, 995. doi: 10.3390/atmos11090995  
509 50. Steinberg, J., Kennedy, E.D., Basler, C., Grant, M.P., Jacobs, J.R., Ortbahn, D., Osburn, J., Saydah, S., Tomasi, S., Clayton, J.L.  
510 COVID-19 Outbreak Among Employees at a Meat Processing Facility - South Dakota, March-April 2020. *MMWR Morb Mortal*  
511 *Wkly Rep.* **2020**, 1015-1019. doi: 10.15585/mmwr.mm6931a2.  
512 51. Donham, K.J., Cumro, D., Reynolds, S. Synergistic effects of dust and ammonia on the occupational health effects of poultry  
513 production workers. *J. Agromed.* **2002**, 8, 57-76. doi:10.1300/J096v08n02\_09  
514 52. Baudron, F., Liégeois, F., Fixing our global agricultural system to prevent the next COVID-19. *Outlook on Agriculture* **2020**,  
515 49(2), 111-118. doi:10.1177/0030727020931122.  
516 53. Zilio, M., Orzi, V., Chiodini, M.E., Riva, C.; Acutis, M.; Boccasile, G., Adani, F. Evaluation of ammonia and odour emissions  
517 from animal slurry and digestate storage in the Po Valley (Italy). *Waste Manag.* **2020**, 103:296-304. doi:  
518 10.1016/j.wasman.2019.12.038

519

520

521

**Table S1.** Regions, provinces, areas, populations, included in the analysis.

| <b>Region</b>  | <b>Province</b>      | <b>Area<br/>(km<sup>2</sup>)</b> | <b>Population</b> | <b>Population<br/>density (km<sup>-2</sup>)</b> |
|----------------|----------------------|----------------------------------|-------------------|-------------------------------------------------|
| Piemonte       | Alessandria          | 3558.8                           | 420017            | 118.0                                           |
| Piemonte       | Asti                 | 1510.1                           | 214342            | 141.9                                           |
| Piemonte       | Biella               | 913.2                            | 174718            | 191.3                                           |
| Piemonte       | Cuneo                | 6905.0                           | 586814            | 84.9                                            |
| Piemonte       | Novara               | 1340.2                           | 369018            | 275.0                                           |
| Piemonte       | Torino               | 6827.0                           | 2256108           | 330.4                                           |
| Piemonte       | Verbano-Cusio-Ossola | 2260.9                           | 157782            | 69.7                                            |
| Piemonte       | Vercelli             | 2081.6                           | 170298            | 81.8                                            |
| Lombardy       | Bergamo              | 2754.9                           | 1112187           | 400.0                                           |
| Lombardy       | Brescia              | 4785.6                           | 1265954           | 264.5                                           |
| Lombardy       | Como                 | 1279.0                           | 599204            | 468.5                                           |
| Lombardy       | Cremona              | 1770.5                           | 358955            | 202.7                                           |
| Lombardy       | Lecco                | 805.6                            | 337380            | 418.8                                           |
| Lombardy       | Lodi                 | 783.0                            | 230198            | 230.2                                           |
| Lombardy       | Monza Brianza        | 405.5                            | 873935            | 2159.8                                          |
| Lombardy       | Milano               | 1575.6                           | 3250315           | 2028.9                                          |
| Lombardy       | Mantova              | 2341.4                           | 412292            | 176.1                                           |
| Lombardy       | Pavia                | 2968.6                           | 545888            | 183.9                                           |
| Lombardy       | Sondrio              | 3195.8                           | 181095            | 56.6                                            |
| Lombardy       | Varese               | 1198.1                           | 890768            | 743.5                                           |
| Veneto         | Belluno              | 3610.2                           | 202950            | 56.0                                            |
| Veneto         | Padova               | 2144.1                           | 937908            | 438.4                                           |
| Veneto         | Rovigo               | 1819.3                           | 234937            | 128.5                                           |
| Veneto         | Treviso              | 2479.8                           | 887806            | 358.5                                           |
| Veneto         | Venezia              | 2472.9                           | 853338            | 344.6                                           |
| Veneto         | Verona               | 3096.3                           | 926497            | 300.0                                           |
| Veneto         | Vicenza              | 2722.5                           | 862418            | 316.8                                           |
| Emilia Romagna | Bologna              | 3703.0                           | 1014619           | 274.7                                           |
| Emilia Romagna | Forlì-Cesena         | 2378.4                           | 394627            | 165.9                                           |
| Emilia Romagna | Ferrara              | 2635.1                           | 345691            | 131.1                                           |
| Emilia Romagna | Modena               | 2688.0                           | 705393            | 262.4                                           |
| Emilia Romagna | Parma                | 3447.4                           | 451631            | 131.1                                           |
| Emilia Romagna | Piacenza             | 2585.8                           | 287152            | 111.2                                           |
| Emilia Romagna | Ravenna              | 1859.4                           | 389456            | 209.3                                           |
| Emilia Romagna | Reggio Emilia        | 2291.2                           | 531891            | 232.1                                           |
| Emilia Romagna | Rimini               | 864.8                            | 339017            | 392.4                                           |
| Sicily         | Agrigento            | 3052.0                           | 435137            | 142.5                                           |
| Sicily         | Caltanissetta        | 2128.0                           | 271758            | 130.0                                           |
| Sicily         | Catania              | 3573.0                           | 1108040           | 310.0                                           |
| Sicily         | Enna                 | 2574.0                           | 164855            | 64.0                                            |
| Sicily         | Messina              | 3266.0                           | 627251            | 192.0                                           |
| Sicily         | Palermo              | 5009.0                           | 1253356           | 250.2                                           |
| Sicily         | Ragusa               | 1623.0                           | 320795            | 197.5                                           |
| Sicily         | Siracusa             | 2124.0                           | 397341            | 187.1                                           |
| Sicily         | Trapani              | 2469.0                           | 428192            | 173.4                                           |

522
